# Supplementary material for: Microfluidics-based rapid measurement of nitrite in human blood plasma
Source: Royal Society of Chemistry journal article supplement (doi:10.1039/d2an00020b), 2022-01-01
Supplement: d2an00020b1.pdf [file d2an00020b1.pdf]

## **Supplementary Information**

### **Microfluidics-based rapid measurement of nitrite in human blood plasma**

R. Gaikwad<sup>1</sup>, P. R. Thangaraj<sup>2</sup>, and A. K. Sen<sup>1</sup> \*

<sup>1</sup>Micro Nano Bio -Fluidics Unit, Fluid Systems Laboratory, Department of Mechanical Engineering, Indian Institute of Technology Madras, Chennai-600036, India.

<sup>2</sup>Department of Cardiothoracic Surgery, Apollo Hospital, Chennai, 600006, India.

\*Corresponding author: [ashis@iitm.ac.in](mailto:ashis@iitm.ac.in)

**Table of contents-**

- Flow rates of the buffer,  $NO_2^-$  stock, plasma, NaOH solution and probe for on-chip mixing and incubation and detection of exogenous  $NO_2^-$  in the centrifuged blood plasma at different concentrations and for 1:2, 1:3, and 1:6 dilutions.

**Table S1** Flow rates of the buffer,  $NO_2^-$  stock (12  $\mu$ M), plasma, NaOH solution and probe for on-chip mixing and reaction and detection of exogenous  $NO_2^-$  in the centrifuged blood plasma at different concentrations and at different dilutions.

| $NO_2^-$<br>concentration<br>( $\mu$ M) | $NO_2^-$<br>stock<br>( $\mu$ L<br>/min) | <i>1:2 dilution</i>      |                          | <i>1:3 dilution</i>      |                          | <i>1:6 dilution</i>      |                          | Probe<br>( $\mu$ L/min) | NaOH<br>( $\mu$ L/min) |
|-----------------------------------------|-----------------------------------------|--------------------------|--------------------------|--------------------------|--------------------------|--------------------------|--------------------------|-------------------------|------------------------|
|                                         |                                         | Buffer<br>( $\mu$ L/min) | Plasma<br>( $\mu$ L/min) | Buffer<br>( $\mu$ L/min) | Plasma<br>( $\mu$ L/min) | Buffer<br>( $\mu$ L/min) | Plasma<br>( $\mu$ L/min) |                         |                        |
| 0                                       | 0                                       | 2.6                      | 2                        | 3.1                      | 1.5                      | 3.75                     | 0.85                     | 0.47                    | 0.93                   |
| 0.06                                    | 0.03                                    | 2.57                     | 2                        | 3.07                     | 1.5                      | 3.72                     | 0.85                     | 0.47                    | 0.93                   |
| 0.12                                    | 0.06                                    | 2.54                     | 2                        | 3.04                     | 1.5                      | 3.69                     | 0.85                     | 0.47                    | 0.93                   |
| 0.24                                    | 0.12                                    | 2.48                     | 2                        | 2.98                     | 1.5                      | 3.63                     | 0.85                     | 0.47                    | 0.93                   |
| 0.48                                    | 0.24                                    | 2.36                     | 2                        | 2.86                     | 1.5                      | 3.51                     | 0.85                     | 0.47                    | 0.93                   |
| 0.96                                    | 0.48                                    | 2.12                     | 2                        | 2.62                     | 1.5                      | 3.27                     | 0.85                     | 0.47                    | 0.93                   |
| 1.92                                    | 0.96                                    | 1.64                     | 2                        | 2.14                     | 1.5                      | 2.79                     | 0.85                     | 0.47                    | 0.93                   |
| 3.85                                    | 1.92                                    | 0.68                     | 2                        | 1.18                     | 1.5                      | 1.83                     | 0.85                     | 0.47                    | 0.93                   |

To obtain Different dilutions (1:2, 1:3, and 1:6) and different exogenous  $NO_2^-$  concentrations for centrifuged plasma, we used  $NO_2^-$  working solution of 12  $\mu$ M. The flow rates used for undiluted centrifuged plasma, buffer, probe and  $NO_2^-$  stock is as shown in Table S1.
